# Supplementary material for: Lung ultrasonography cannot identify the categories of neonatal pneumonia: the Findings From A Prospective Multicenter Study Running Head: LUS cannot identify the categories of pneumonia
Source: Research Square preprint supplement (doi:10.21203/rs.3.rs-8573536/v1), 2026-01-25
Supplement: Supplementary file 1 [file 2258d1b9c9679fd4b82185f0.docx]

**Tables**

Table 1. Characteristics of LUS findings in patients with various types of pneumonia

|  | No. | | | | |
| --- | --- | --- | --- | --- | --- |
| Group | PLA | B lines | LC | PT | PE |
| IP (N=195) | 195 | 147 | 195 | 3 | 28 |
| Non-IP (N=40) | 40 | 27 | 40 | 1 | 3 |
| Non-VAP (N=123) | 123 | 90 | 123 | 3 | 15 |
| VAP (N=72) | 72 | 57 | 72 | 0 | 13 |
| MAP (N=23) | 23 | 15 | 23 | 1 | 2 |
| Non-MAP (N=17) | 17 | 12 | 17 | 0 | 1 |

Note: LC, lung consolidation; LUS, lung ultrasound; MAP, meconium aspiration pneumonia; PE, pleural effusion; PLA, pleural line abnormalities; PT, pneumothorax; VAP, ventilator-associated pneumonia.

Table 2. Comparison of LUS findings in different pneumonia groups

|  | Median (IQR) | | | | |
| --- | --- | --- | --- | --- | --- |
| Group | PLA | B lines | LC | PT | PE |
| IP (N=195) | 8(8) | 4(7) | 4(5) | 0(0) | 0(0) |
| Non-IP (N=40) | 12(5) | 4(12) | 5(7) | 0(0) | 0(0) |
| *p*-Values | 0.22 | 0.98 | 0.30 | 0.30 | 0.63 |
| Non-VAP (N=123) | 8(8) | 4(8) | 4(6) | 0(0) | 0(0) |
| VAP (N=72) | 9(8) | 4(10) | 4(6) | 0(0) | 0(0) |
| *p*-Values | 0.20 | 0.22 | 0.96 | 0.18 | 0.16 |
| MAP (N=23) | 12(7) | 2(12) | 4(7) | 0(0) | 0(0) |
| Non-MAP (N=17) | 8(4) | 8(12) | 6(6) | 0(0) | 0(0) |
| *p*-Values | 0.84 | 0.32 | 0.37 | 0.78 | 0.42 |

Note: IQR, interquartile range; LC, lung consolidation; LUS, lung ultrasound; MAP, meconium aspiration pneumonia; PE, pleural effusion; PLA, pleural line abnormalities; PT, pneumothorax; VAP, ventilator-associated pneumonia.

Table 3. Comparison of lung consolidation between patients with infectious pneumonia and those with noninfectious pneumonia

|  | PLA  No. (%) |  | B line  No. (%) |  | LC  No. (%) |  |
| --- | --- | --- | --- | --- | --- | --- |
| Group | Left | Right | Left | Right | Left | Right |
| IP(N=195) | 185(94.9) | 186(95.4) | 134(68.7) | 138(70.8) | 168(86.2) | 174(89.2) |
| Non-IP(N=40) | 39(97.5) | 39(97.5) | 27(67.5) | 25(62.5) | 34(85.0) | 40(100) |
| *p*-Values | 0.70 | 1.00 | 0.88 | 0.30 | 0.85 | 0.03 |

Abbreviations: LC, lung consolidation; LUS, lung ultrasound; PLA, pleural line abnormality.
